# Supplementary material for: Identifying the Differences of Injury Patterns in Fatal Falls from Height and Pedestrian Traffic Accidents: An Autopsy Study and Comparison with Literature for Differential Diagnosis in Ambiguous Cases
Source: Preprints.org preprint supplement (doi:10.20944/preprints202405.1130.v1), 2024-05-17
Supplement: Supplementary file 2 [file supplementary]

## Sheet: Foglio1
References	Event	N. of cases	Age/Gender	Analized District	Fractures	Internal Organ Injuries	External Injuries
Teixeira et Al., 2011 [7]	Pedestrian	112	n.a.	All	Ribs 86\112	Thoracic Aorta Rupture 34\112	n.a.
					Sternum 22\112	Hemothorax 79\112
					Clavicle 12\112	Diaphragm 9\112
					Cranium 56\112	Spleen 30\112
					Spine 52\112	Liver 49\112
					Pelvis 44\112	Kidneys 16\112
					Upper limbs 33\112	Pancreas 7\112
					Lower limbs 58\112	Mesentery 11\112
						Esophagus 2\112
						Stomach 2\112
						Small intestine 4\112
						Colon 3\112
						Bladder 8\112
						Brain 75\112
						Subarachnoid Hemorrhage 55\112
						Subdural hemorrhage30\112
Yogesh, 2015 [8]	Pedestrian	29	n.a.	Spine	Upper Cervical 2/29	n.a.	n.a.
					Lower Cervical 3/29
					Thoracic 9/29
					Lumbar 12/29
					Multiple sections 3/29
Rancic et Al., 2014 [9]	Pedestrian	91	n.a.	Head	Cranial vault 13/91	Brain 58/91	n.a.
					Cranial Base 4/91	Brainstem 28/91
					Cranial Vault + Cranial Base 26/91	Epidura Hemorrhage 3/91
					MaxilloFacial 2/91	Subdural Hemorrhage65/91
					Cranial vault+ Cranial Base + Maxillofacial 19/91	Subarachnoid Hemorrhage 46/91
					Cranial Vault + Maxillofacial 1/91	Intraparenchymal Cerebral Hemorrhage 32/91
					Cranial Base + Maxillofacial 1/91
Edirisinghe et Al., 2014 [10]	Pedestrian	157	n.a./ M:121; F:31	All	Cranium 109/157	Brain 119/157	Head 141/157
					Cervical Spine 26/157	Heart 29/157	Anterior Trunk 4/157
					Thoracic Spine 15/157	Lungs 62/157	Posterior Trunk 72/157
					Lumbar Spine 7/157	Aorta 16/157	Upper Limbs 114/157
					Ribs 98/157	Liver 39/157	Lower Limbs 112/157
					Pelvis 20/157	Spleen 20/157
					Upperl Limbs 20/157	Kidneys 14/157
					Lower Limbs 38/157	Intestine 11/157
					Absence of fractures 5/157	Pelvic Organs 8/157
						Absence of Internal Organs injuries 10/157
Karger et Al., 2001 [11]	Pedestrian	53	42.5 (mean) /n.a.	Lower limbs, Spine, Pelvis	Tibia 25/53	n.a.
					Fibula 20/53
					Cervical Spine 8/53		Legs 31/53
					Thoracic Spine 18/53
					Lumbar Spine 5/53
					Pelvis 28/53
Gouda et Al., 2014 [12]	Pedestrian	40	n.a.	All	Cranium36/40	n.a.	n.a.
					Cervical Spine 20/40
					Thoracic Spine 3/40
					Lumbar Spine 2/40
					Sternum 8/40
					Ribs 15/40
					Pelvis 6/40
					Clavicle 15/40
					Scapula 2/40
					Humerus 5/40
					Forearm 5/40
					Hand 2/40
					Femur 6/40
					Patella 9/40
					Leg 21/40
					Foot 9/40
Teresinski et Al., 2001 [13]	Pedestrian	317	n.a.	Lower Limbs	External Malleoulus 14/317	n.a.	n.a.
					Internal Malleulus 24/317
					Bimalleolar 26/317
					Trimalleolar 8/317
					Talus 18/317
					Tarsal 9/317
Madro et Al., 2001 [14]	Pedestrian	124	n.a.	Head, Neck	Occipitocervical juction 27/124	n.a.	n.a.
					Cervical Spine 47/124
					Cranial Base 7/124
Ravi Kumar et Al., 2018 [15]	Pedestrian	62	n.a.	Thorax	Sternum 25/62	n.a.	n.a.
					Ribs 62/62
Vladimir Živković et Al., 2012 [16]	Pedestrian	360	57.1 (mean) / M:236, F:124	Head	Cranial Vault 247/360	Brain 290/360	n.a.
					Cranial Base 236/360
					Maxillary 26/360	Brainstem 50/360
					Upper Cervical Spine 32/360
					Facial 79/360
Teresiński et Al., 2001 [17]	Pedestrian	371	n/a	Pelvis	Pelvis 127/371	n.a.	n.a.
					Femur 7/371
Yamanouchi et Al., 2002 [18]	Pedestrian	153	n.a.	All	Cranial Vault 87/153	Brain 71/153	n.a.
					Cranial Base 56/153	Brain Herniation 16/153
					Maxxillary 19/153	Subarachnoid Hemorrhage 44/153
					Cervical Spine 29/153	Heart 24/153
					Thoracic SPine 46/153	Aorta 25/153
					Lumbar Spine 19/153	Lungs 33/153
					Ribs 107/153	Hemothorax 44/153
					Sternum 29/153	Diaphragm 14
					Pelvis 77/153	Liver 16/153
					Femur 38/153	Kidneys 28/153
					Tibia 34/153	Spleen 16/153
					Fibula 29/153	Hemoperitoneum 62/153
					Humerus 21/153
					Ulna 11/153
					Radius 16/153
					Scapula 31/153
					Clavicle 12/153
Thankamma et Al, 2019 [19]	Pedestrian	35	n.a.	Thorax	n.a.	Lungs 17/35	n.a.
Thankamma et. Al.,2019 [19]	Fall from Height	46	n.a.	Thorax	n.a.	Bilateral Lungs 4/46	n.a.
						Right Lung 8/46
						Left Lung 5/46
Naveen et. Al.,2019 [20]	Fall from Height	90	20±6 (mean) / M:78, F:12	All	Cranial Vault 56/90	Brain 69/90	Head 74/90
					Ribs 57/90	Lungs 41/90
					Upper and/or Lower Limbs 13/90	Liver 25/90
					Pelvis 10/90	Kidneys 20/90
Bansal et. Al.,2019 [21]	Fall from Height	40	30±5 (mean) / M:34, F:6	All (for fractures only head distict)	Cranial Vault 22/40	Brain 19/40	n.a.
						Intraparenchymal Cerebral Hemorrhage 32/40
						Lungs 2/40
						Liver 6/40
						Spleen 4/40
						Heart 0/40
						Kidneys 0/40
Cywka et. Al.,2019 [22]	Fall from Height	114	n.a.	Head, Thorax, Pelvis	Ribs 90/114	n.a.	n.a.
					Cranial Vault 60/114
					Pelvis 35/114
Behera et. Al.,2010 [23]	Fall from Height	174	n.a./ M:106, F:68	All		Subarachnoid Hemorrhage 96/174	n.a.
					Cranial Vault 103/174	Subdural Hemorrhage 60/174
					Spine 10/174	Epidural Hemorrhage 13/174
					Pelvis 2/174	Intraparenchymal Cerebral Hemorrhage 18/174
					Upper Limbs 36/174	Brain 35/174
					Lower Limbs 31/174	Lungs 9/174
						Liver 8/174
						Spleen 1/174
Atanasijevic et. Al.,2009 [24] (cases of falls above 30m were excluded)	Fall from Height	568	n.a./ M:412, F:154	Thorax, Spine	Left Ribs 73/568	Aorta 91/568	n.a.
					Right Ribs 68/568	Heart 69/568
					Bilateral Ribs 201/568
					Sternum 107/568
					Thoracic Spine 35/568
Atanasijevic et. Al.,2005 [25] (same sample of [24])	Fall from Height	568	n.a.	Head, Thorax, Abdomen	Ribs 342/568	Brain 441/568	n.a.
					Cranial Vault 418/568	Epidural Hemorrhage 6/568
						Subdural Hemorrhage 70/568
						Emorragia cerebrale intraparenchimale 12/568
						Lungs 135/568
						Stomach + Intestine 42/568
						Kidneys 50/568
						Liver 120/568
						Spleen 81/568
						Hemothorax 125/568
						Pneumothorax 70/568
						Hemoperitoneum 33/568
Kohli et. Al.,2006 [26]	Fall from Height	151	32.8 (mean) /M:134, F:17	All	Cranial Vault 31/151	Subdural Hemorrhage75/151	Head 129/151
					Cranial Base 37/151	Epidural Hemorrhage 21/151	Upper and Lower Limbs 122/151
					Cranial Vault + Cranial Base 25/151	Subarachnoid Hemorrhage 94/151	Trunk (anterior+posterior) 54/151
					Cervical Spine 18/151	Intraparenchymal Cerebral Hemorrhage 8/151
					Thoarcic Spine 2/151	Brain 114/151
					Pelvis 9/151	Lungs 7/151
					Ribs 32/151	Liver 14/151
					Sternum 5/151	Spleen 7/151
					Clavicle 3/151	Intestine 3/151
					Upper Limbs 8/151
					Lower Limbs 12/151
Tu¨rk et. Al.,2004 [27]	Fall from Height	68	n.a./ M:49, F:19	All	Cranail vaul 34/68	Intracranial Hemorrhage 34/68	Head 27/68
					Cranial Base 1/68	Brain 34/68	Upper and Lower Limbs 68/68
					Ribs 53/78	Aorta 10/68	Head 17/68
					Upper and/or Lower Limbs 40/68	Lungs 42/68	Trunk 32/68
					Wrist 17/68	Liver 35/68
					Ankle 8/68	Spleen 37/68
					Pelvis 32/68	Heart 24/68
Eray Çakı et. Al.,2021 [28]	Fall from Height	206	n.a./ M:170, F:36	All	Cranial Vault 59/206	Subarachnoid Hemorrhage 76/206
					Cranial Base 55/206	Subdural Hemorrhage 32/206	Head and Neck 128/206
					Ribs 85/206	Epidural Hemorrhage 18/206	Trunk (anterior) 65/206
					Sternum 29/206	Brain 35/206	Trunk (posterior) 43/206
					Spine 75/206	Lungs 36/206	Lower Limbs 118/206
					Pelvis 37/206	Liver 28/206	Upper Limbs 101/206
					Upper Limbs 31/206	Spleen 19/206	Pelvic region 10/206
					Lower Limbs 43/206	Kidneys 13/206
Yurtseven et. Al.,2017 [29]	Fall from Height	80	34,06 ± 9,6 (mean) / M:72, F:8	All	Cranial Base 14/80		n.a.
					Cranial Vault22/80	Lungs 74/80
					Facial 1/80	Liver 47/80
					Hyoid 3/80	Spleen 31/80
					Thyroid Cartilage 5/80	Intraparenchymal Cerebral Hemorrhage 28/80
					Ribs 59/80	Aorta 28/80
					Sternum 27/80	Brain 33/80
					Pelvis 11/80	Heart 28/80
					Upper Limbs 4/80
					Lower Limbs 5/80
Suresh et. Al.,2016 [30]	Fall from Height	46	n.a./ M:38, F:8	Head and Spine for Fractures, Thorax and Abdomen for internal organs	Cranial Vault+ Spine 24/46	Thoracic and Abdominal Organs 9/46	n.a.
					Cranial Vault 31/46
					Spine 24/46
Teresiński et. Al.,2016 [31]	Fall from Height	41	18-83 (range)/ M:32, F:9	Thorax, Spine, Upper and Lower Limbs, Pelvis, Abdomen.	Ribs 31/41	Heart 12/41	n.a.
					Spine 23/41	Liver 21/41
					Upper and/or Lower Limbs 29/41
					Pelvis 18/41
Hüseyin et. Al.,2017 [32]	Fall from Height	170	39.96 ± 22.25 (mean) / M:120, F:69	Head, Spine, Neck, Thorax	Ribs 123/170	n.a.	n.a.
					Cervical Spine 22/170
					Maxillary 16/170
					Hyoid 9/170
					Clavicle 22/170
					Thyroid Cartilage 11/170
Türkoğlu et. Al.,2019 [33]	Fall from Height	213	43.6 ± 27.4 (mean) / M:144, F:69	All		Subarachnoid Hemorrhage 54/213	n.a.
					Cranial Vault 24/213	Subarachnoid + Subdural Hemorrhage 38/213
					Cranial Base 17/213	Subarachnoid + Subdural + Epidural Hemorrhage10/213
					Cranial Vault + Cranial Base 71/213	Brain 15/213
					Ribs 89/213	Thoracic Aorta 11/213
					Upper and/or Lower Limbs 72/213	Great Vassel (other than aorta) 6/213
						Ascending Aorta 4/213
						Aortic Arch 4/213
						Ascending Aorta + Aortic Arch 2/213
Goren et. Al.,2003 [34]	Fall from Height	484	n.a.	Spine, Thorax, Upper and Lower Limbs, Pelvis	Ribs 120/484		n.a.
					Cervical Spine 48/484	n.a.
					Upper and/or Lower Limbs 49/484
					Pelvis 74/484
Petaros et Al., 2013 [35]	Fall from Height	151	n.a.	All	Cranium 69/151	n.a.	n.a.
					Cervical Spine 16/151
					Scapula 14/151
					Upper Limbs35/151
					Lower Limbs 45/151
					Ribs 98/151
					Pelvis 35/151
